# Supplementary material for: MIAMI-AD (Methylation in Aging and Methylation in AD): an integrative knowledgebase that facilitates explorations of DNA methylation across sex, aging, and Alzheimer’s disease
Source: PubMed Central journal article supplement — medRxiv. 2023 Dec 5:2023.12.04.23299412. Preprint. [Version 1] doi: 10.1101/2023.12.04.23299412 (PMC10723513; doi:10.1101/2023.12.04.23299412), 2023-12-05
Supplement: NIHPP2023.12.04.23299412v1-supplement-2.pdf [file NIHPP2023.12.04.23299412v1-supplement-2.pdf]

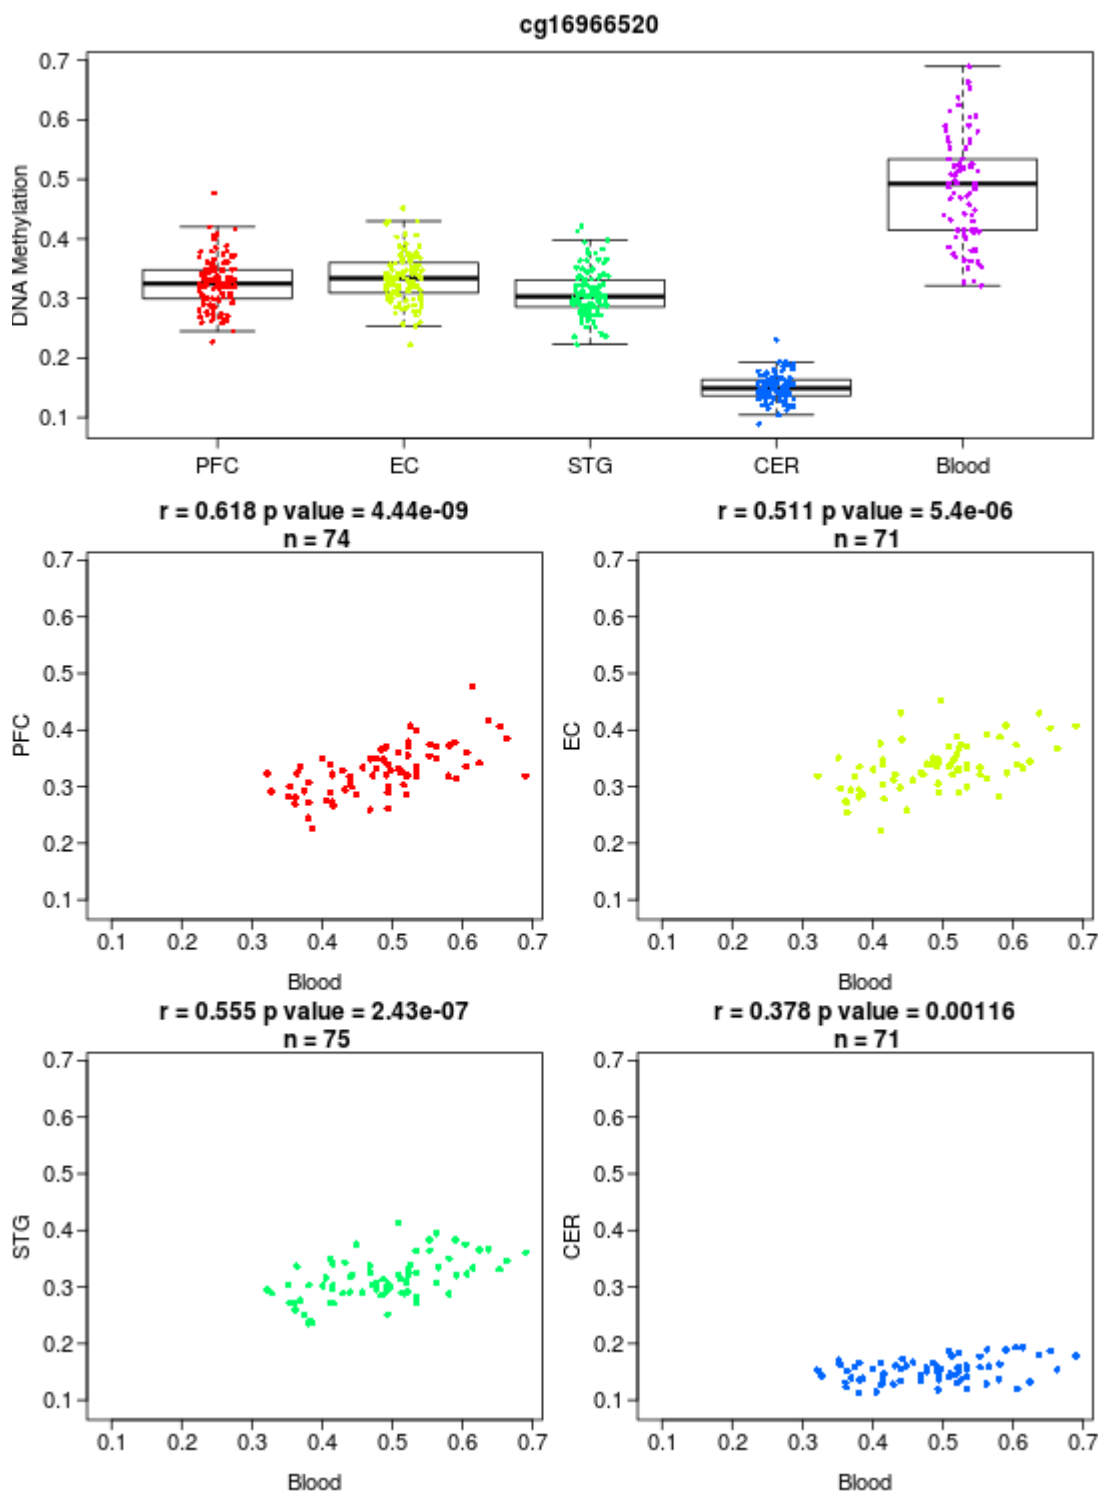

**Supplementary Figure 1** Blood DNA methylation at cg16966520 in the promoter region of the *EIF2D* gene is significantly associated with brain DNA methylation in the prefrontal cortex (PFC), entorhinal cortex (EC), superior temporal gyrus (STC), and cerebellum (CER). These results were obtained from the Blood Brain DNA Methylation Comparison Tool (<https://epigenetics.essex.ac.uk/bloodbrain/>).

Tour

## CpG Query

A

Datasets Display Data Display Plot

Refresh Download Tables

### Selected Datasets

Show 10 entries

Search:

| Dataset | Description                                    | Author    | Year | PMID                     |
|---------|------------------------------------------------|-----------|------|--------------------------|
| SIC     | Blood DNAm associated with Alzheimer's disease | Silva     | 2022 | <a href="#">35982059</a> |
| MCA     | Blood DNAm associated with chronological age   | McCartney | 2020 | <a href="#">31892350</a> |

Showing 1 to 2 of 2 entries

Previous 1 Next

### Annotations

Show 10 entries

Search:

| CpG        | chr   | pos      | Illumina | Relation_to_Island | RefGene_Group | mQTL | Blood-Brain comparison |
|------------|-------|----------|----------|--------------------|---------------|------|------------------------|
| cg13270055 | chr22 | 36960499 | CACNG2   |                    | Body          | mQTL | Blood-Brain            |

Showing 1 to 1 of 1 entries

Previous 1 Next

### Individual Datasets

Show 10 entries

Search:

| CpG        | dataset | phenotype | sex_specific | sample_group                     | statistics                | direction | statistics_value | pValue   |
|------------|---------|-----------|--------------|----------------------------------|---------------------------|-----------|------------------|----------|
| cg13270055 | SIC     | AD        | No           | ADNI + AIBL                      | OR for AD (meta-analysis) | -         | 0.967            | 1.65e-06 |
| cg13270055 | SIC     | AD        | No           | AIBL                             | OR for AD                 | -         | 0.97             | 9.79e-04 |
| cg13270055 | SIC     | AD        | No           | ADNI                             | OR for AD                 | -         | 0.964            | 4.58e-04 |
| cg13270055 | MCA     | Aging     | No           | Generation Scotland, Discovery   | estimate for age effect   | +         | 0.008            | 1.89e-20 |
| cg13270055 | MCA     | Aging     | No           | Generation Scotland, Replication | estimate for age effect   | +         | 0.006            | 6.89e-20 |

Showing 1 to 5 of 5 entries

Previous 1 Next

B

## CpG Query

Datasets Display Data Display Plot

### Forest Plot

Plots per row

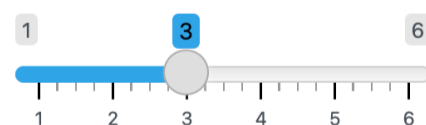

cg13270055 SIC (association with AD)

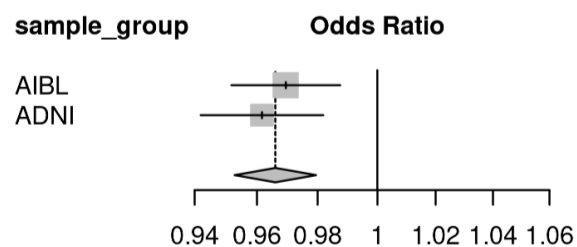

cg13270055 MCA (association with age)

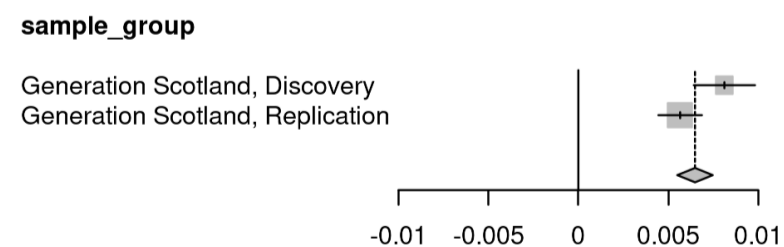

**Supplementary Figure 2** DNA methylation at cg13270055 located on the *CACNG2* gene increases with age ( $P_{\text{discovery}} = 1.89 \times 10^{-20}$ ,  $P_{\text{replication}} = 6.89 \times 10^{-20}$ ), but decreases in the blood samples of Alzheimer's subjects ( $P_{\text{meta-analysis}} = 1.65 \times 10^{-6}$ ,  $P_{\text{AIBL}} = 9.79 \times 10^{-4}$ ,  $P_{\text{ADNI}} = 4.58 \times 10^{-4}$ ). The summary statistics are shown under **(A)** Display Data tab, and the forest plots are shown under **(B)** Display Plot tab.

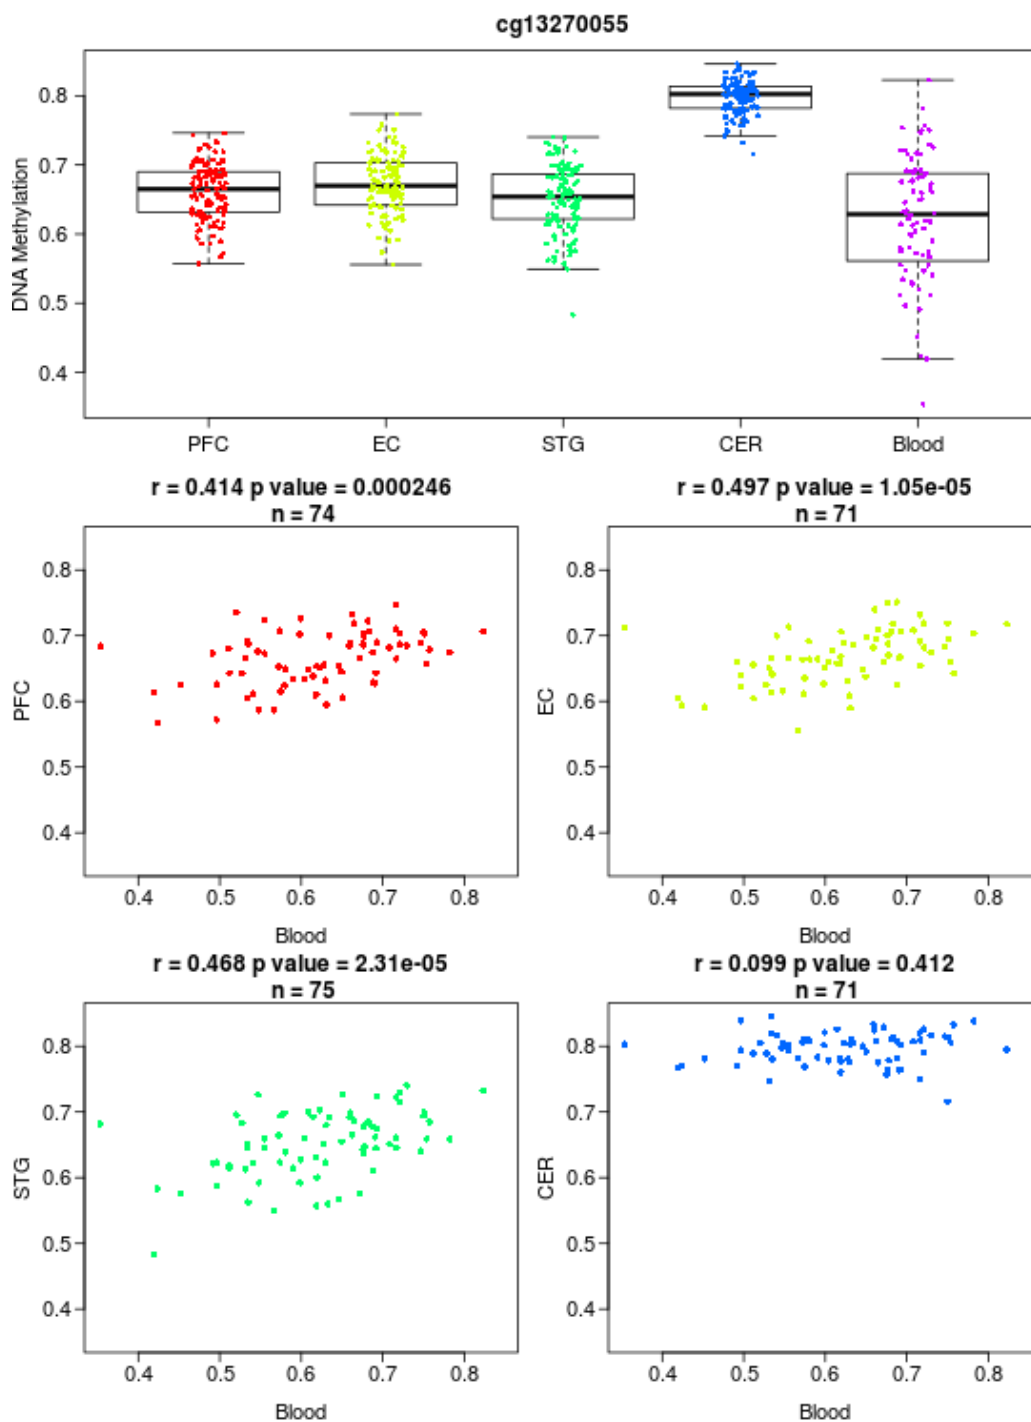

**Supplementary Figure 3** Blood DNA methylation at cg13270055 located on the *CACNG2* gene is significantly associated with brain DNA methylation in the prefrontal cortex (PFC), entorhinal cortex (EC), superior temporal gyrus (STC), and cerebellum (CER). These results were obtained from the Blood Brain DNA Methylation Comparison Tool (<https://epigenetics.essex.ac.uk/bloodbrain/>).

**Genome-wide Query**

Datasets Display Data Display Plot

Refresh Download Tables

**Selected Datasets**  
To select a different set of CpGs  
- change significance level: double click on **Threshold**

Show 10 entries Search:

| Dataset | Description                                               | Author | Year | PMID     | Source      | Metric                                                               | Filter                                                                  | Threshold |
|---------|-----------------------------------------------------------|--------|------|----------|-------------|----------------------------------------------------------------------|-------------------------------------------------------------------------|-----------|
| SIF     | Blood DNAm associated with Alzheimer's disease in females | Silva  | 2022 | 36109771 | ADNI + AIBL | <input checked="" type="radio"/> pValue<br><input type="radio"/> FDR | <input checked="" type="radio"/> < than<br><input type="radio"/> > than | 0.00001   |
| SIM     | Blood DNAm associated with Alzheimer's disease in males   | Silva  | 2022 | 36109771 | ADNI + AIBL | <input checked="" type="radio"/> pValue<br><input type="radio"/> FDR | <input checked="" type="radio"/> < than<br><input type="radio"/> > than | 0.00001   |

Showing 1 to 2 of 2 entries Previous 1 Next

**Annotated CpGs** Explore Top 10 CpGs

Show 10 entries Search:

| CpG                                                                                                                                     | chr | pos | illumina | dataset | sample_group | phenotype | sex_specific | statistics | direction | statistics_value | pValue |
|-----------------------------------------------------------------------------------------------------------------------------------------|-----|-----|----------|---------|--------------|-----------|--------------|------------|-----------|------------------|--------|
| No significant CpGs. - There are no CpGs that meet all of the threshold cutoffs. Please adjust the thresholds or the datasets selected. |     |     |          |         |              |           |              |            |           |                  |        |

Showing 0 to 0 of 0 entries Previous Next

### B. Selecting female-specific CpGs associated with AD

Datasets Display Data Display Plot

Refresh Download Tables

**Selected Datasets**  
To select a different set of CpGs  
- change significance level: double click on **Threshold**

Show 10 entries Search:

| Dataset | Description                                               | Author | Year | PMID     | Source      | Metric                                                               | Filter                                                                  | Threshold |
|---------|-----------------------------------------------------------|--------|------|----------|-------------|----------------------------------------------------------------------|-------------------------------------------------------------------------|-----------|
| SIF     | Blood DNAm associated with Alzheimer's disease in females | Silva  | 2022 | 36109771 | ADNI + AIBL | <input checked="" type="radio"/> pValue<br><input type="radio"/> FDR | <input checked="" type="radio"/> < than<br><input type="radio"/> > than | 0.00001   |
| SIM     | Blood DNAm associated with Alzheimer's disease in males   | Silva  | 2022 | 36109771 | ADNI + AIBL | <input checked="" type="radio"/> pValue<br><input type="radio"/> FDR | <input type="radio"/> < than<br><input checked="" type="radio"/> > than | 0.05      |

**Annotated CpGs** Explore Top 10 CpGs

Show 10 entries Search:

| CpG        | chr  | pos      | illumina      | dataset | sample_group | phenotype | sex_specific | statistics                | direction | statistics_value | pValue   |
|------------|------|----------|---------------|---------|--------------|-----------|--------------|---------------------------|-----------|------------------|----------|
| cg18020072 | chr6 | 31590640 | SNORA38;BAT2  | SIF     | ADNI + AIBL  | AD        | Yes, females | OR for AD (meta-analysis) | +         | 1.328            | 3.02e-08 |
| cg18020072 | chr6 | 31590640 | SNORA38;BAT2  | SIM     | ADNI + AIBL  | AD        | Yes, males   | OR for AD (meta-analysis) | +         | 1.051            | 2.49e-01 |
| cg24276069 | chr1 | 45243927 | RPS8;SNORD38B | SIF     | ADNI + AIBL  | AD        | Yes, females | OR for AD (meta-analysis) | +         | 1.233            | 9.62e-08 |
| cg24276069 | chr1 | 45243927 | RPS8;SNORD38B | SIM     | ADNI + AIBL  | AD        | Yes, males   | OR for AD (meta-analysis) | -         | 0.955            | 2.08e-01 |

### C. Selecting male-specific CpGs associated with AD

**Genome-wide Query**

Datasets Display Data Display Plot

Refresh Download Tables

**Selected Datasets**  
To select a different set of CpGs  
- change significance level: double click on **Threshold**

Show 10 entries Search:

| Dataset | Description                                               | Author | Year | PMID     | Source      | Metric                                                               | Filter                                                                  | Threshold |
|---------|-----------------------------------------------------------|--------|------|----------|-------------|----------------------------------------------------------------------|-------------------------------------------------------------------------|-----------|
| SIF     | Blood DNAm associated with Alzheimer's disease in females | Silva  | 2022 | 36109771 | ADNI + AIBL | <input checked="" type="radio"/> pValue<br><input type="radio"/> FDR | <input type="radio"/> < than<br><input checked="" type="radio"/> > than | 0.05      |
| SIM     | Blood DNAm associated with Alzheimer's disease in males   | Silva  | 2022 | 36109771 | ADNI + AIBL | <input checked="" type="radio"/> pValue<br><input type="radio"/> FDR | <input checked="" type="radio"/> < than<br><input type="radio"/> > than | 0.00001   |

**Annotated CpGs** Explore Top 10 CpGs

Show 10 entries Search:

| CpG        | chr   | pos       | illumina | dataset | sample_group | phenotype | sex_specific | statistics                | direction | statistics_value | pValue   |
|------------|-------|-----------|----------|---------|--------------|-----------|--------------|---------------------------|-----------|------------------|----------|
| cg02672643 | chr11 | 110790527 |          | SIF     | ADNI + AIBL  | AD        | Yes, females | OR for AD (meta-analysis) | +         | 1.049            | 2.05e-01 |
| cg02672643 | chr11 | 110790527 |          | SIM     | ADNI + AIBL  | AD        | Yes, males   | OR for AD (meta-analysis) | +         | 1.19             | 1.62e-06 |
| cg15757041 | chr16 | 5115938   | C16orf89 | SIF     | ADNI + AIBL  | AD        | Yes, females | OR for AD (meta-analysis) | +         | 1.058            | 4.70e-01 |
| cg15757041 | chr16 | 5115938   | C16orf89 | SIM     | ADNI + AIBL  | AD        | Yes, males   | OR for AD (meta-analysis) | -         | 0.677            | 3.69e-06 |
| cg15281611 | chr1  | 54040884  | GLIS1    | SIF     | ADNI + AIBL  | AD        | Yes, females | OR for AD (meta-analysis) | +         | 1.058            | 1.07e-01 |
| cg15281611 | chr1  | 54040884  | GLIS1    | SIM     | ADNI + AIBL  | AD        | Yes, males   | OR for AD (meta-analysis) | +         | 1.181            | 6.66e-06 |
| cg03827739 | chr10 | 75401754  | MYOZ1    | SIF     | ADNI + AIBL  | AD        | Yes, females | OR for AD (meta-analysis) | +         | 1.038            | 3.93e-01 |
| cg03827739 | chr10 | 75401754  | MYOZ1    | SIM     | ADNI + AIBL  | AD        | Yes, males   | OR for AD (meta-analysis) | +         | 1.199            | 8.03e-06 |

**Supplementary Figure 4** Using Genome-wide Query to perform sex-specific analysis.

A. Selected Datasets and CpG

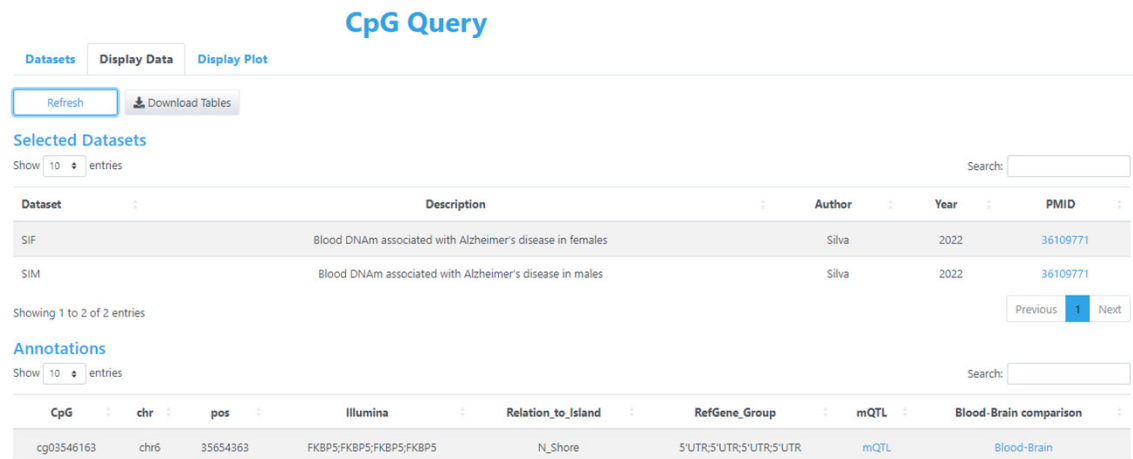

B Results under "Display Data" tab

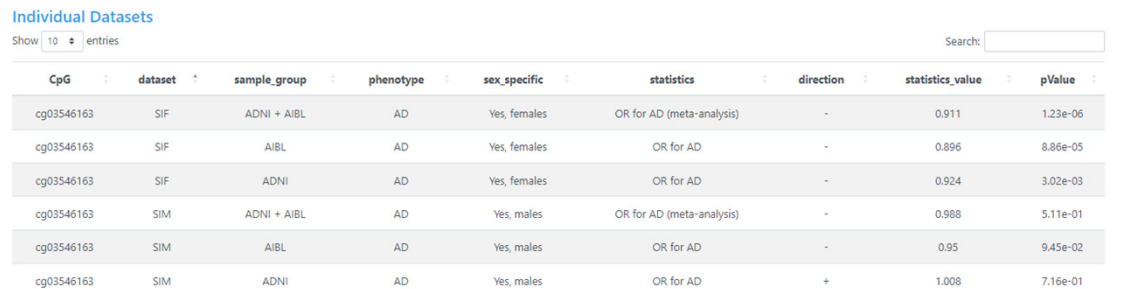

C Results under the "Display Plot" tab

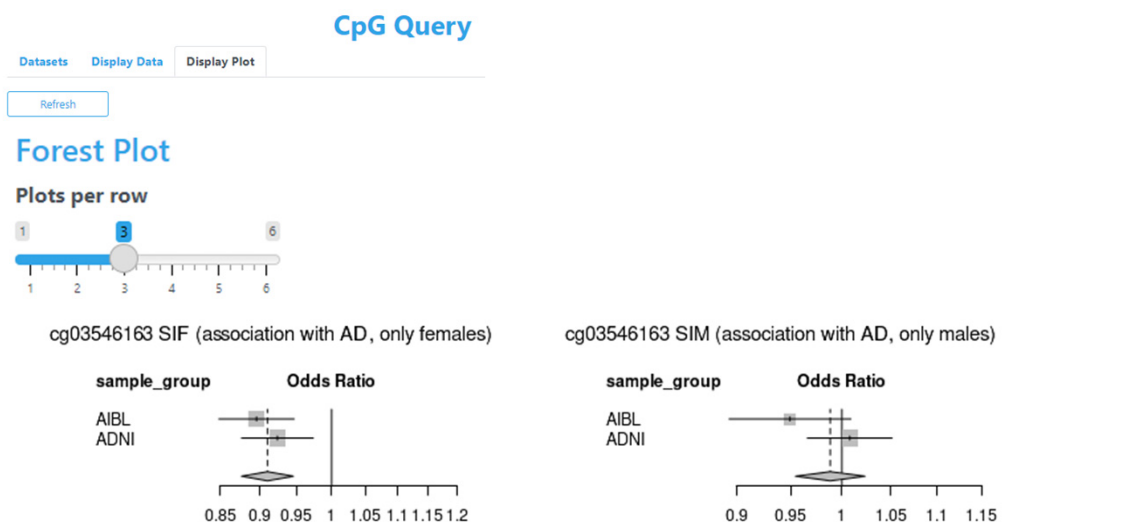

**Supplementary Figure 5** The CpG Query Tool can be used to explore details of DNA methylation at female-specific CpG cg03546163 associated with AD.
